# Supplementary material for: Association Between Diet, Physical Activity and Body Mass Index, Fat Mass Index and Bone Mineral Density of Soldiers of the Polish Air Cavalry Units
Source: PubMed Central journal article supplement (PMC7019523; doi:10.3390/nu12010242), 2020-01-17
Supplement: nutrients-12-00242-s001.pdf [file nutrients-12-00242-s001.pdf]

**Table S1.** Comparison of food frequency consumption between soldiers with adequate and inadequate nutritional status (BMI, FMI, BMD T-score).

| Groups of foods                                                  | Adequate BMI |      | Adequate FMI |      | Adequate BMD T-score |      | p        |         |             |
|------------------------------------------------------------------|--------------|------|--------------|------|----------------------|------|----------|---------|-------------|
|                                                                  | YES          | NO   | YES          | NO   | YES                  | NO   | BMI      | FMI     | BMD T-score |
| <b>Food groups</b>                                               |              |      |              |      |                      |      |          |         |             |
| Fruits, vegetables, seeds of legume, and potatoes                | 5.96         | 5.52 | 5.59         | 5.96 | 5.68                 | 5.12 | 0.582    | 0.643   | 0.859       |
| Cereal products                                                  | 2.22         | 1.74 | 1.84         | 2.15 | 1.90                 | 2.37 | 0.007**  | 0.183   | 0.123       |
| Dairy products and eggs                                          | 2.42         | 2.04 | 2.17         | 2.25 | 2.24                 | 1.78 | 0.068*   | 0.549   | 0.284       |
| Meat products and fish                                           | 2.55         | 1.92 | 2.05         | 2.44 | 2.11                 | 2.99 | 0.009**  | 0.193   | 0.364       |
| Fats, nuts, and grains                                           | 2.24         | 1.69 | 1.74         | 2.28 | 1.85                 | 2.75 | 0.033**  | 0.012** | 0.087*      |
| Sweets and snacks                                                | 1.70         | 1.23 | 1.40         | 1.47 | 1.35                 | 2.12 | 0.105    | 0.421   | 0.262       |
| Non-alcoholic beverages                                          | 1.41         | 0.80 | 0.97         | 1.22 | 1.03                 | 1.42 | <0.001** | 0.158   | 0.123       |
| Alcoholic beverages                                              | 0.32         | 0.34 | 0.32         | 0.35 | 0.32                 | 0.38 | 0.941    | 0.918   | 0.871       |
| <b>Selected foods</b>                                            |              |      |              |      |                      |      |          |         |             |
| Fruits, vegetables, seeds of legumes, and potatoes               |              |      |              |      |                      |      |          |         |             |
| Fruits together—all types                                        | 0.74         | 0.65 | 0.69         | 0.67 | 0.67                 | 0.62 | 0.790    | 0.475   | 0.988       |
| Stone fruits                                                     | 0.19         | 0.24 | 0.23         | 0.20 | 0.22                 | 0.12 | 0.662    | 0.751   | 0.183       |
| Kiwi fruit and citrus                                            | 0.21         | 0.25 | 0.23         | 0.23 | 0.24                 | 0.18 | 0.813    | 0.687   | 0.285       |
| Other tropical fruits                                            | 0.08         | 0.16 | 0.13         | 0.12 | 0.13                 | 0.02 | 0.201    | 0.215   | 0.034**     |
| Bananas                                                          | 0.57         | 0.42 | 0.48         | 0.49 | 0.48                 | 0.41 | 0.044**  | 0.775   | 0.858       |
| Apples and pears                                                 | 0.55         | 0.38 | 0.45         | 0.44 | 0.44                 | 0.51 | 0.038**  | 0.966   | 0.513       |
| Avocado                                                          | 0.03         | 0.06 | 0.04         | 0.06 | 0.05                 | 0.01 | 0.061*   | 0.111   | 0.124       |
| Olives                                                           | 0.05         | 0.10 | 0.07         | 0.10 | 0.09                 | 0.01 | 0.152    | 0.085*  | 0.278       |
| Dried fruits                                                     | 0.15         | 0.08 | 0.13         | 0.07 | 0.12                 | 0.02 | 0.827    | 0.091*  | 0.099*      |
| Sweet fruit preserves and candied fruits                         | 0.13         | 0.06 | 0.09         | 0.10 | 0.09                 | 0.09 | 0.023**  | 0.783   | 0.287       |
| Vegetables—all types                                             | 0.63         | 0.62 | 0.64         | 0.61 | 0.62                 | 0.62 | 0.804    | 0.904   | 0.837       |
| Crucifers                                                        | 0.26         | 0.27 | 0.24         | 0.31 | 0.26                 | 0.27 | 0.736    | 0.289   | 0.870       |
| Yellow–orange vegetables                                         | 0.33         | 0.31 | 0.28         | 0.41 | 0.32                 | 0.27 | 0.257    | 0.123   | 0.520       |
| Green leafy vegetables                                           | 0.19         | 0.20 | 0.19         | 0.21 | 0.20                 | 0.13 | 0.489    | 0.569   | 0.358       |
| Tomatoes                                                         | 0.54         | 0.44 | 0.46         | 0.52 | 0.47                 | 0.44 | 0.248    | 0.401   | 0.621       |
| Vegetables: fresh cucumbers, squash, zucchini, pumpkin, eggplant | 0.43         | 0.36 | 0.37         | 0.43 | 0.38                 | 0.38 | 0.237    | 0.564   | 0.973       |
| Root vegetables and others                                       | 0.30         | 0.36 | 0.34         | 0.31 | 0.34                 | 0.27 | 0.693    | 0.541   | 0.500       |
| Fresh seeds of legumes and canned ones                           | 0.13         | 0.13 | 0.14         | 0.12 | 0.13                 | 0.13 | 0.726    | 0.385   | 0.758       |
| Dry seeds of legumes                                             | 0.08         | 0.08 | 0.08         | 0.09 | 0.08                 | 0.11 | 0.989    | 0.858   | 0.952       |
| Potatoes in various forms                                        | 0.46         | 0.41 | 0.40         | 0.51 | 0.43                 | 0.51 | 0.422    | 0.138   | 0.429       |

| Cereal products                                          |      |      |      |      |      |      |          |         |         |
|----------------------------------------------------------|------|------|------|------|------|------|----------|---------|---------|
| Wholemeal or with grains, so-called dark bread           | 0.61 | 0.52 | 0.56 | 0.55 | 0.55 | 0.55 | 0.432    | 0.957   | 0.789   |
| Refined bread, so-called white bread                     | 0.76 | 0.41 | 0.50 | 0.66 | 0.51 | 1.05 | <0.001** | 0.044** | 0.055*  |
| Unrefined groats coarse                                  | 0.25 | 0.27 | 0.25 | 0.29 | 0.27 | 0.22 | 0.636    | 0.700   | 0.691   |
| Refined cereal grain                                     | 0.34 | 0.32 | 0.33 | 0.33 | 0.32 | 0.35 | 0.900    | 0.894   | 0.724   |
| Ready-to-eat breakfast cereal products                   | 0.28 | 0.22 | 0.21 | 0.34 | 0.26 | 0.20 | 0.155    | 0.494   | 0.730   |
| Dairy products and eggs                                  |      |      |      |      |      |      |          |         |         |
| Milk and milk drinks                                     | 0.54 | 0.55 | 0.57 | 0.50 | 0.56 | 0.33 | 0.695    | 0.854   | 0.200   |
| Sweetened milk drinks                                    | 0.36 | 0.23 | 0.27 | 0.33 | 0.30 | 0.14 | 0.031**  | 0.183   | 0.257   |
| Cottage cheese                                           | 0.42 | 0.35 | 0.38 | 0.37 | 0.38 | 0.38 | 0.142    | 0.208   | 0.946   |
| Flavored cottage cheese                                  | 0.15 | 0.10 | 0.11 | 0.13 | 0.11 | 0.16 | 0.102    | 0.379   | 0.733   |
| Cheese                                                   | 0.48 | 0.32 | 0.33 | 0.50 | 0.38 | 0.50 | 0.051*   | 0.140   | 0.249   |
| Eggs and egg dishes                                      | 0.46 | 0.50 | 0.52 | 0.42 | 0.50 | 0.27 | 0.826    | 0.257   | 0.042** |
| Meat products and fish                                   |      |      |      |      |      |      |          |         |         |
| Sausages, different types                                | 0.71 | 0.34 | 0.45 | 0.59 | 0.46 | 0.93 | <0.001** | 0.117   | 0.230   |
| High-quality cold cuts                                   | 0.63 | 0.41 | 0.46 | 0.58 | 0.47 | 0.78 | 0.003**  | 0.158   | 0.182   |
| Sausage products and offal                               | 0.15 | 0.15 | 0.14 | 0.16 | 0.15 | 0.19 | 0.621    | 0.110   | 0.894   |
| Red meat                                                 | 0.26 | 0.31 | 0.29 | 0.27 | 0.29 | 0.16 | 0.375    | 0.959   | 0.256   |
| Poultry and rabbit                                       | 0.42 | 0.48 | 0.45 | 0.49 | 0.46 | 0.38 | 0.486    | 0.414   | 0.569   |
| Wild game meat                                           | 0.05 | 0.02 | 0.05 | 0.01 | 0.04 | 0.02 | 0.023**  | 0.072*  | 0.619   |
| Lean fish                                                | 0.17 | 0.12 | 0.13 | 0.16 | 0.12 | 0.29 | 0.991    | 0.780   | 0.676   |
| Oily fish                                                | 0.18 | 0.09 | 0.10 | 0.18 | 0.11 | 0.28 | 0.416    | 0.594   | 0.582   |
| Fats, nuts and grains                                    |      |      |      |      |      |      |          |         |         |
| Oil, all kinds                                           | 0.38 | 0.34 | 0.34 | 0.39 | 0.36 | 0.39 | 0.349    | 0.380   | 0.654   |
| Butter, all types                                        | 0.71 | 0.50 | 0.54 | 0.70 | 0.55 | 1.02 | 0.021**  | 0.242   | 0.006** |
| Margarine, all types                                     | 0.39 | 0.15 | 0.19 | 0.36 | 0.23 | 0.47 | 0.008**  | 0.149   | 0.178   |
| Cream, sweet or sour cream. for food or beverages        | 0.15 | 0.19 | 0.13 | 0.26 | 0.18 | 0.12 | 0.531    | 0.137   | 0.585   |
| Other animal fats                                        | 0.09 | 0.05 | 0.06 | 0.09 | 0.06 | 0.17 | 0.338    | 0.991   | 0.151   |
| Mayonnaise and dressings, i.e. salad dressings—all types | 0.24 | 0.14 | 0.18 | 0.18 | 0.17 | 0.37 | 0.073*   | 0.169   | 0.055*  |
| Nuts                                                     | 0.20 | 0.20 | 0.20 | 0.20 | 0.21 | 0.11 | 0.255    | 0.641   | 0.098*  |
| Grains                                                   | 0.09 | 0.12 | 0.10 | 0.13 | 0.11 | 0.09 | 0.654    | 0.689   | 0.323   |
| Sweets and snacks                                        |      |      |      |      |      |      |          |         |         |
| Sugar to sweeten beverages                               | 0.71 | 0.52 | 0.54 | 0.72 | 0.55 | 1.02 | 0.098*   | 0.155   | 0.025** |
| Honey to sweeten food and beverages                      | 0.20 | 0.18 | 0.21 | 0.14 | 0.17 | 0.28 | 0.691    | 0.007** | 0.779   |

|                                                           |      |      |      |      |      |      |          |         |        |
|-----------------------------------------------------------|------|------|------|------|------|------|----------|---------|--------|
| Chocolate, chocolate candies, and candy bars              | 0.33 | 0.22 | 0.27 | 0.25 | 0.25 | 0.44 | 0.386    | 0.751   | 0.642  |
| Non-chocolate candies                                     | 0.12 | 0.08 | 0.10 | 0.09 | 0.10 | 0.04 | 0.976    | 0.314   | 0.664  |
| Biscuits and cakes                                        | 0.17 | 0.13 | 0.15 | 0.14 | 0.14 | 0.25 | 0.083*   | 0.409   | 0.371  |
| Ice cream and pudding                                     | 0.05 | 0.04 | 0.04 | 0.05 | 0.04 | 0.03 | 0.922    | 0.918   | 0.569  |
| Salty snacks                                              | 0.14 | 0.09 | 0.12 | 0.08 | 0.12 | 0.05 | 0.280    | 0.394   | 0.676  |
| Soft drinks                                               |      |      |      |      |      |      |          |         |        |
| Fruit juices and fruit nectars                            | 0.64 | 0.33 | 0.43 | 0.52 | 0.43 | 0.74 | <0.001** | 0.424   | 0.095* |
| Vegetable juices and vegetable-fruit ones                 | 0.18 | 0.15 | 0.17 | 0.16 | 0.18 | 0.06 | 0.451    | 0.970   | 0.176  |
| Energy drinks                                             | 0.24 | 0.12 | 0.17 | 0.18 | 0.18 | 0.18 | 0.051*   | 0.855   | 0.868  |
| Sweetened sodas such as Fanta, Coca-Cola, Mirinda, Sprite | 0.35 | 0.20 | 0.21 | 0.36 | 0.25 | 0.45 | 0.005**  | 0.015** | 0.050* |
| Alcoholic beverages                                       |      |      |      |      |      |      |          |         |        |
| Beer                                                      | 0.22 | 0.18 | 0.20 | 0.19 | 0.19 | 0.31 | 0.430    | 0.705   | 0.515  |
| Wine and drinks                                           | 0.05 | 0.08 | 0.06 | 0.08 | 0.07 | 0.04 | 0.994    | 0.803   | 0.556  |
| Vodka and spirits                                         | 0.05 | 0.08 | 0.06 | 0.08 | 0.07 | 0.03 | 0.261    | 0.381   | 0.180  |

U Mann-Whitney Test

\* statistical tendency  $0.05 \leq p \leq 0.1$

\*\* statistical significance  $p < 0.05$
